# Supplementary material for: Improved resolution of single channel dwell times reveals mechanisms of binding, priming, and gating in muscle AChR
Source: PubMed Central journal article supplement — J Gen Physiol. 2016 Jul;148(1):43–63. doi: 10.1085/jgp.201611584 (PMC4924934; doi:10.1085/jgp.201611584), 2016-07
Supplement: supp_jgp.201611584_JGP_201611584_sm.pdf [file supp_jgp.201611584_JGP_201611584_sm.pdf]

## SUPPLEMENTAL MATERIAL

Mukhtasimova et al., <http://www.jgp.org/cgi/content/full/jgp.201611584/DC1>

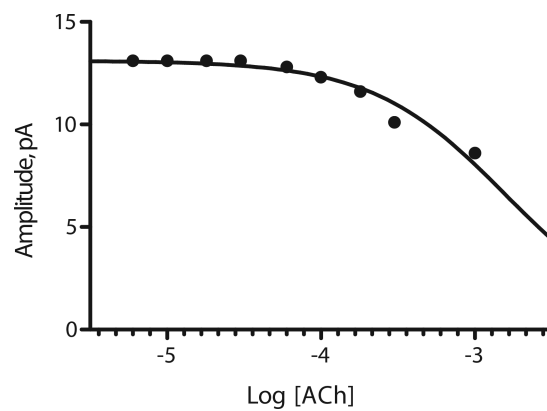

Figure S1. **Single channel current amplitude versus ACh concentration.** Current amplitudes were determined from the fit of the sum of Gaussian functions to all-points histograms from raw data obtained at the indicated concentrations; the difference between the means of the baseline and open channel currents is displayed. The same recordings used for kinetic analysis were analyzed. The smooth curve is a fit of the function for single site inhibition with an  $IC_{50}$  of 1.6 mM.

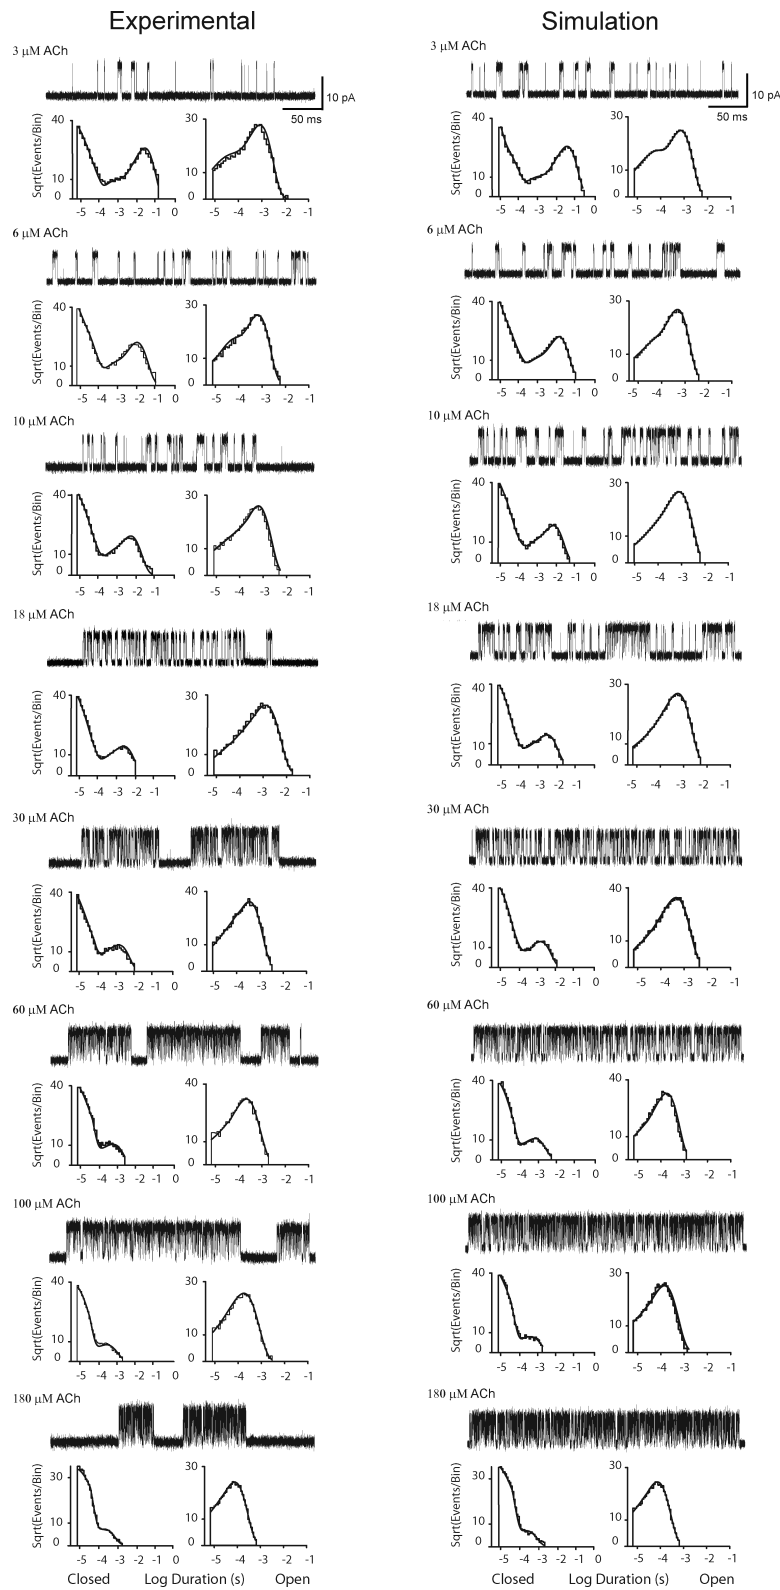

Figure S2. Analysis of experimental and simulated single channel currents for the adult human AChR activated by ACh. Data for all ACh concentrations used in the global fit are shown. For each of the indicated ACh concentrations, events from a single channel are displayed at a bandwidth of 25 kHz, and the corresponding closed and open time histograms are displayed with the global fit of Scheme 1 to the data overlaid. Rate constants from the global fit are presented in Table 1.

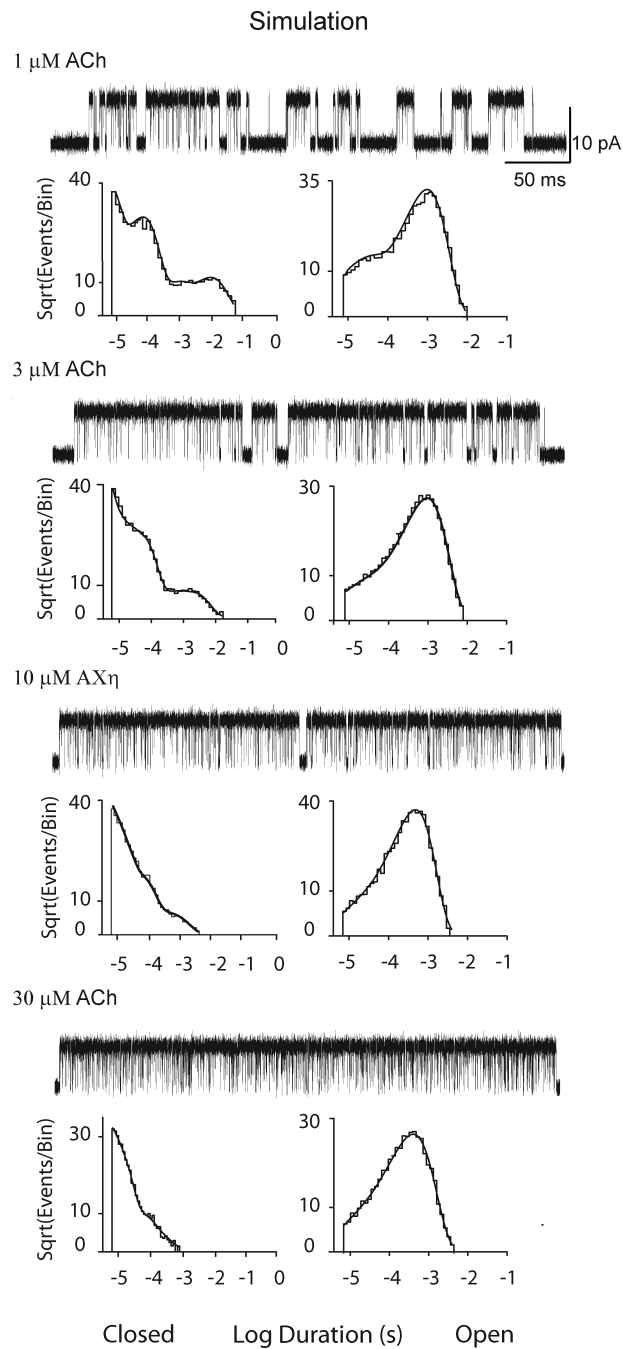

Figure S3. **Analysis of simulated single channel currents for the  $\alpha$ G153S mutant AChR activated by ACh.** The corresponding experimental data are shown in Fig. 6. For each of the indicated ACh concentrations, events from a single channel are displayed at a bandwidth of 25 kHz, and the corresponding closed and open time histograms are displayed with the global fit of Scheme 1 to the data overlaid. Rate constants from the global fit are presented in Table 1.

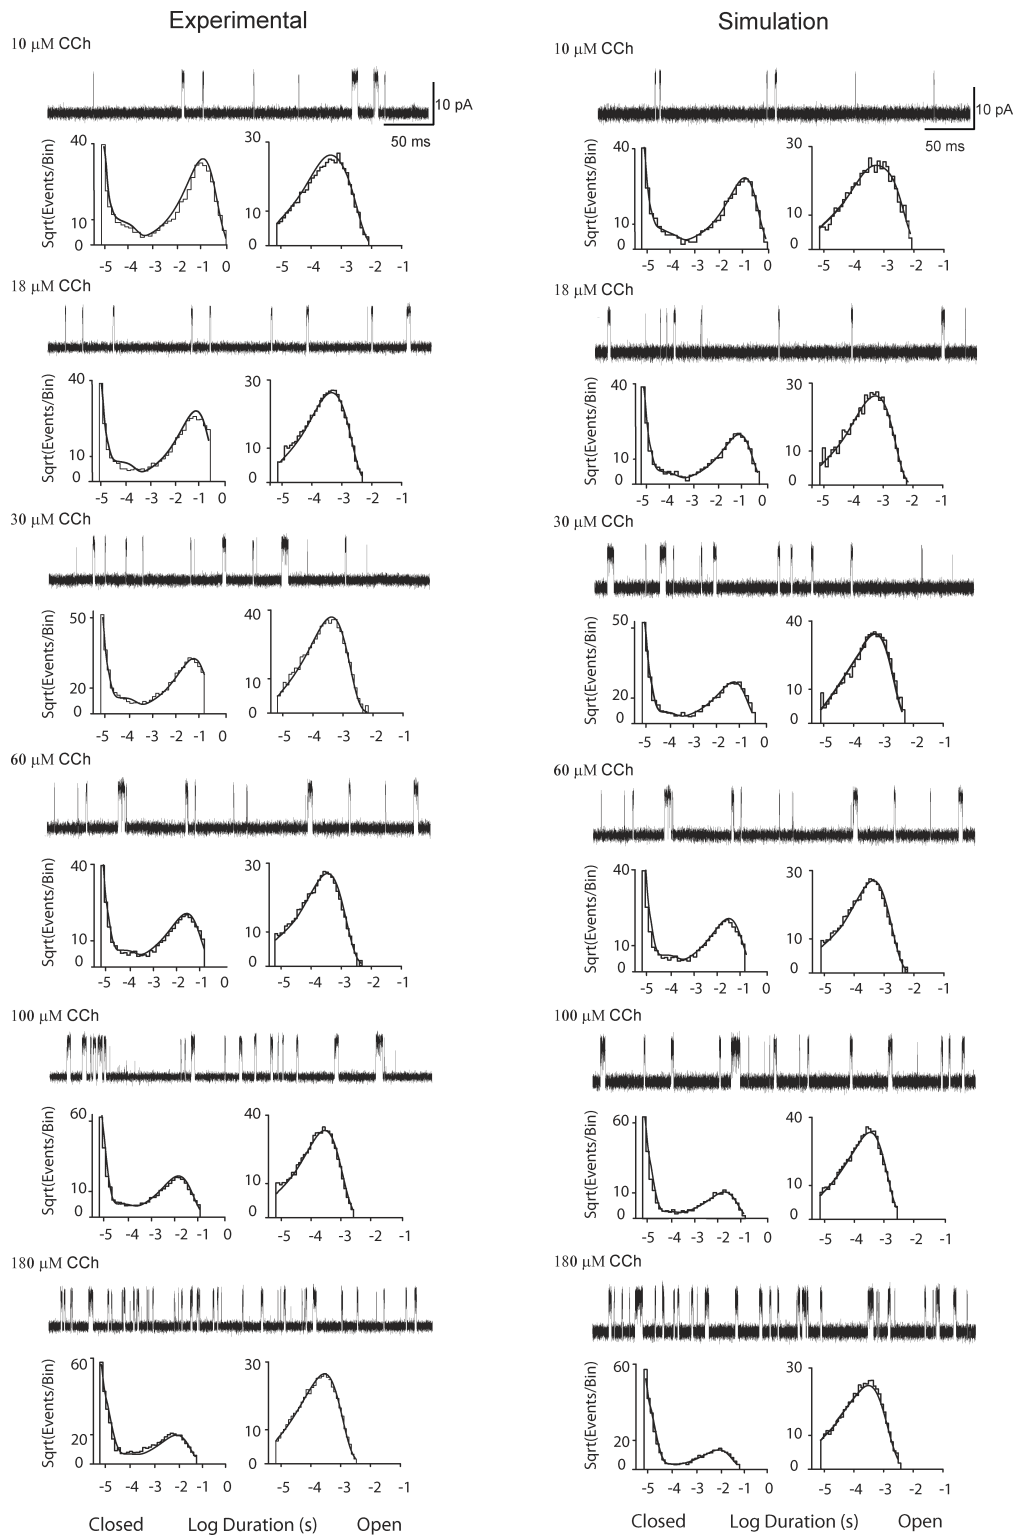

Figure S4. **Analysis of experimental and simulated single channel currents for the adult human AChR activated by CCh.** Data for all CCh concentrations used for the global fit are shown. For each of the indicated CCh concentrations, events from a single channel are displayed at a bandwidth of 25 kHz, and the corresponding closed and open time histograms are displayed with the global fit of Scheme 1 to the data overlaid. Rate constants from the global fit are presented in Table 2.

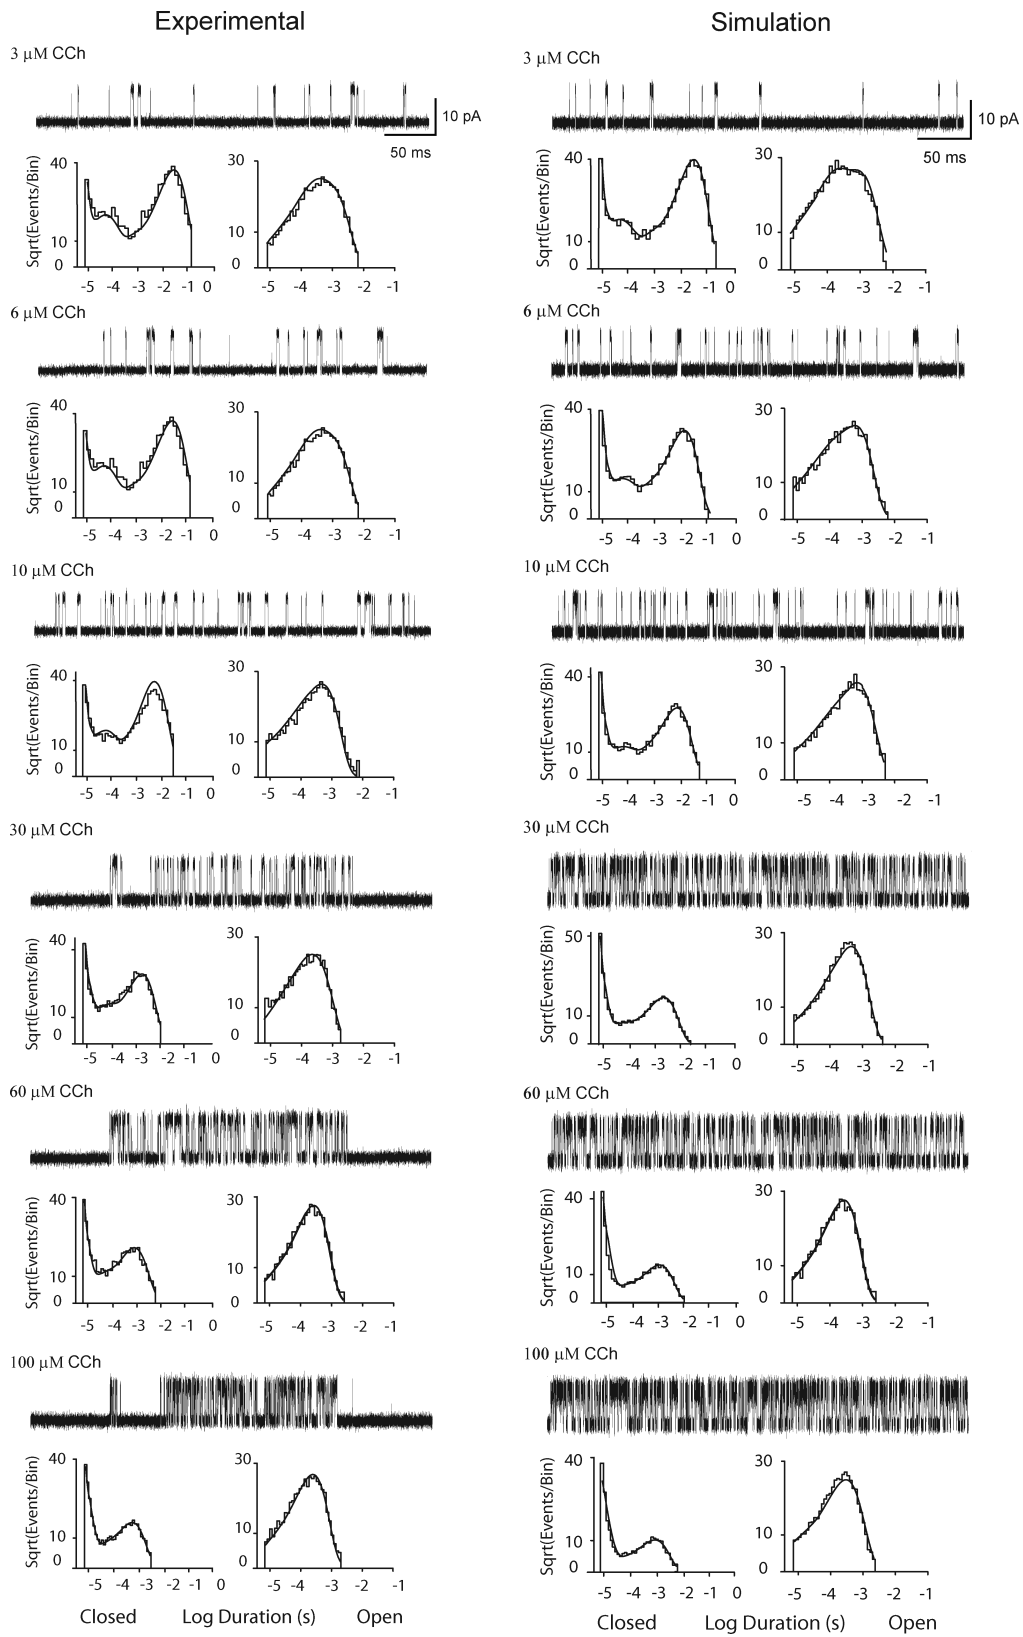

Figure S5. Analysis of experimental and simulated single channel currents for the  $\alpha$ G153S mutant AChR activated by CCh. Data for all CCh concentrations used for the global fit are shown. For each of the indicated CCh concentrations, events from a single channel are displayed at a bandwidth of 25 kHz, and the corresponding closed and open time histograms are displayed with the global fit of Scheme 1 to the data overlaid. Rate constants from the global fit are presented in Table 2.

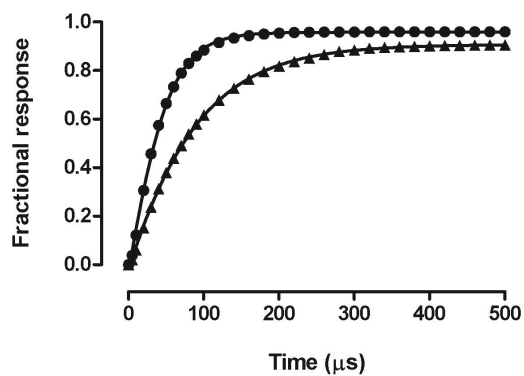

Figure S6. **Predicted macroscopic current as a function of time after a step increase of the ACh concentration for the wild-type AChR.** Filled triangles were generated from Scheme 2 and the fitted rate constants:  $p_{+2} = 19,200 \text{ s}^{-1}$ ,  $p_{-2} = 86,000 \text{ s}^{-1}$ ,  $\beta_2 = 125,000 \text{ s}^{-1}$ ,  $\alpha_2 = 2,100 \text{ s}^{-1}$  (see Table 2). Filled circles were generated by Scheme 2 and rate constants that yield a mean burst duration of 3.3 ms obtained in the presence of calcium:  $p_{+2} = 37,000 \text{ s}^{-1}$ ,  $p_{-2} = 44,000 \text{ s}^{-1}$ ,  $\beta_2 = 125,000 \text{ s}^{-1}$ ,  $\alpha_2 = 2,100 \text{ s}^{-1}$ . A sigmoid function was fitted to each time course. The 20–80% rise times are 110  $\mu\text{s}$  for the triangles and 50  $\mu\text{s}$  for the circles.

Table S1. Comparison of schemes with and without primed states

|                                     | 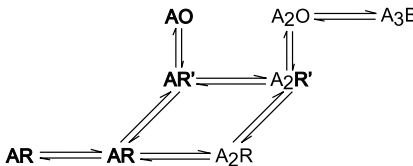 |  |
|-------------------------------------|-----------------------------------------------------------------------------------|-------------------------------------------------------------------------------------|
| Wild type/ACh<br><i>n</i> = 250,278 | LL = 1,940,170<br>SIC = -1,940,077                                                | LL = 1,938,987<br>SIC = -1,938,925                                                  |
| αG153S/ACh<br><i>n</i> = 123,444    | LL = 969,095<br>SIC = -969,007                                                    | LL = 967,534<br>SIC = -967,475                                                      |
| Wild type/CCh<br><i>n</i> = 97,985  | LL = 604,855<br>SIC = -604,769                                                    | LL = 604,520<br>SIC = -604,446                                                      |
| αG153S/CCh<br><i>n</i> = 60,419     | LL = 424,253<br>SIC = -424,170                                                    | LL = 423,911<br>SIC = -423,856                                                      |

The Schwartz information criterion (SIC), used to compare nonnested schemes, is given by  $SIC = -LL + FP/2 \ln N$ , where LL is the log likelihood, FP is the number of free parameters, and N is the number of open and closed dwell times (Koehler and Murphree, 1988; Shelley et al., 2010). The scheme with the smallest SIC value has the highest rank.

Table S2. Comparison of cyclic and noncyclic schemes

|               | 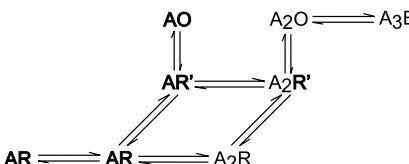 |  |                         |
|---------------|------------------------------------------------------------------------------------|-------------------------------------------------------------------------------------|-------------------------|
| Wild type/ACh | LL = 1,940,170                                                                     | LL = 1,939,864                                                                      | LLR = 5.72<br>P < 0.001 |
| αG153S/ACh    | LL = 969,095                                                                       | LL = 968,614                                                                        | LLR = 6.17<br>P < 0.001 |
| Wild type/CCh | LL = 604,855                                                                       | LL = 604,834                                                                        | LLR = 3.04<br>P < 0.02  |
| αG153S/CCh    | LL = 424,253                                                                       | LL = 424,235                                                                        | LLR = 2.89<br>P < 0.02  |

Comparison of the two schemes was done using the likelihood ratio test (Materials and methods).

Table S3. Effect of noise on event detection in simulated data

| [ACh]  | Total events simulated | Events above threshold after adding rise time | Events above threshold after adding rise time, baseline, and open channel noise |
|--------|------------------------|-----------------------------------------------|---------------------------------------------------------------------------------|
| 3 μM   | 21,563                 | 10,000                                        | 10,657                                                                          |
| 6 μM   | 23,227                 | 10,000                                        | 10,937                                                                          |
| 10 μM  | 23,370                 | 10,000                                        | 11,044                                                                          |
| 18 μM  | 21,771                 | 10,000                                        | 10,639                                                                          |
| 30 μM  | 21,841                 | 10,000                                        | 10,701                                                                          |
| 60 μM  | 22,159                 | 10,000                                        | 10,793                                                                          |
| 100 μM | 21,785                 | 10,000                                        | 10,661                                                                          |
| 180 μM | 22,377                 | 10,000                                        | 10,699                                                                          |

Stochastic events for each ACh concentration were simulated using the rate constants in Table 1 derived from a direct fit of Scheme 1 to the experimental single channel dwell times for the wild-type AChR activated by ACh, as described in Materials and methods. Dwell times were then sampled at intervals of 0.2 μs, subjected to the effective Fc corresponding to a 25-kHz digital Gaussian filter, and detected before and after adding noise.

Table S4. Results from simulation followed by kinetic fitting

| Receptor/Agonist                      | Input         | Output         |
|---------------------------------------|---------------|----------------|
| <b>Wild type/ACh</b>                  |               |                |
| Experimental $\beta_2$ and $\alpha_2$ | 190,000/3,140 | 320,000/6,900  |
| Simulated $\beta_2$ and $\alpha_2$    | 78,000/1,304  | 96,000/1,507   |
|                                       | 100,000/1,850 | 150,000/2,486  |
|                                       | 130,000/2,425 | 220,000/3,625  |
|                                       | 125,000/2,100 | 200,000/3,180  |
| <b><math>\alpha</math>G153S/ACh</b>   |               |                |
| Experimental $\beta_2$ and $\alpha_2$ | 240,000/3,600 | 440,000/13,500 |
| Simulated $\beta_2$ and $\alpha_2$    | 150,000/2,370 | 250,000/3,700  |
| <b>Wild type/CCh</b>                  |               |                |
| Experimental $\beta_2$ and $\alpha_2$ | 310,000/6,200 | 330,000/10,700 |
| Simulated $\beta_2$ and $\alpha_2$    | 100,000/1,900 | 310,000/6,700  |
| <b><math>\alpha</math>G153S/CCh</b>   |               |                |
| Experimental $\beta_2$ and $\alpha_2$ | 330,000/6,400 | 340,000/9,910  |
| Simulated $\beta_2$ and $\alpha_2$    | 130,000/2,570 | 320,000/6,700  |

For each receptor/agonist combination, the indicated input values of  $\beta_2$  and  $\alpha_2$  are used to simulate stochastic dwell time sequences, followed by application of the experimental sampling interval, effective filter bandwidth, and baseline and open channel noise. Units of the rate constants are  $s^{-1}$ . The output values of  $\beta_2$  and  $\alpha_2$  were obtained after detection of open and closed intervals for the same range of agonist concentrations used experimentally, followed by maximum likelihood fitting of the global data (see Results section).

## REFERENCES

- Koehler, A.B., and E.H. Murphree. 1988. A comparison of the Akaike and Schwarz criteria for selecting model order. *Appl. Stat.* 37:187–195. <http://dx.doi.org/10.2307/2347338>
- Shelley, C., X. Niu, Y. Geng, and K.L. Magleby. 2010. Coupling and cooperativity in voltage activation of a limited-state BK channel gating in saturating  $Ca^{2+}$ . *J. Gen. Physiol.* 135:461–480. <http://dx.doi.org/10.1085/jgp.200910331>
